# Supplementary material for: Prognostic relevance of autophagy markers LC3B and p62 in esophageal adenocarcinomas
Source: PubMed Central journal article supplement (PMC5129929; doi:10.18632/oncotarget.9649), 2016-05-26
Supplement: oncotarget-07-39241-s001.pdf [file oncotarget-07-39241-s001.pdf]

# Prognostic relevance of autophagy markers LC3B and p62 in esophageal adenocarcinomas

## Supplementary Material

**Supplementary Table 1.1:** Cross-tabulation for LC3B dots and p62 dots individual scores with p-value (bold = significant)

| Staining pattern |          | p62 dots |    |    | Total |
|------------------|----------|----------|----|----|-------|
| LC3B dots        | Score    | 0        | 1  | 2  |       |
|                  | <b>0</b> | 28       | 23 | 7  | 58    |
|                  | <b>1</b> | 14       | 20 | 5  | 39    |
|                  | <b>2</b> | 6        | 6  | 5  | 17    |
|                  | <b>3</b> | 0        | 0  | 2  | 2     |
| <b>Total</b>     |          | 48       | 49 | 19 | 116   |
| <b>p= 0.020</b>  |          |          |    |    |       |

**Supplementary Table 1.2:** Cross-tabulation for LC3B dots and p62 cytoplasm individual scores with p-value

| Staining pattern |          | p62 cytoplasm |    |    |   | Total |
|------------------|----------|---------------|----|----|---|-------|
| LC3B dots        | Score    | 0             | 1  | 2  | 3 |       |
|                  | <b>0</b> | 28            | 23 | 12 | 0 | 58    |
|                  | <b>1</b> | 14            | 20 | 11 | 0 | 39    |
|                  | <b>2</b> | 6             | 6  | 4  | 1 | 17    |
|                  | <b>3</b> | 0             | 0  | 0  | 0 | 2     |
| <b>Total</b>     |          | 12            | 76 | 27 | 1 | 116   |
| <b>p= 0.167</b>  |          |               |    |    |   |       |

**Supplementary Table 1.3:** Cross-tabulation for LC3B dots and p62 nuclear individual scores with p-value

| Staining pattern |          | p62 nuclear |    |    | Total |
|------------------|----------|-------------|----|----|-------|
| LC3B dots        | Score    | 0           | 1  | 2  |       |
|                  | <b>0</b> | 33          | 19 | 6  | 58    |
|                  | <b>1</b> | 15          | 17 | 7  | 39    |
|                  | <b>2</b> | 8           | 6  | 3  | 17    |
|                  | <b>3</b> | 2           | 0  | 0  | 2     |
| <b>Total</b>     |          | 58          | 42 | 16 | 116   |
| <b>p= 0.473</b>  |          |             |    |    |       |

**Supplementary Table 2.1:** Cross-tabulation for individual p62 dots and p62 cytoplasmic scores with p-value (bold = significant)

| Staining pattern |          | p62 cytoplasm |          |          |          | Total |
|------------------|----------|---------------|----------|----------|----------|-------|
| p62 dots         | Score    | <b>0</b>      | <b>1</b> | <b>2</b> | <b>3</b> |       |
|                  | <b>0</b> | 9             | 34       | 5        | 0        | 48    |
|                  | <b>1</b> | 2             | 33       | 14       | 0        | 49    |
|                  | <b>2</b> | 1             | 9        | 8        | 1        | 19    |
| <b>Total</b>     |          | 12            | 76       | 27       | 1        | 116   |
| <b>p= 0.005</b>  |          |               |          |          |          |       |

**Supplementary Table 2.2:** Cross-tabulation for individual p62 nuclear and p62 dots scores with p-value

| Staining pattern |          | p62 nuclear |          |          | Total |
|------------------|----------|-------------|----------|----------|-------|
| p62 dots         | Score    | <b>0</b>    | <b>1</b> | <b>2</b> |       |
|                  | <b>0</b> | 23          | 15       | 10       | 48    |
|                  | <b>1</b> | 24          | 20       | 5        | 49    |
|                  | <b>2</b> | 11          | 7        | 1        | 19    |
| <b>Total</b>     |          | 58          | 42       | 16       | 116   |
| <b>p= 0.394</b>  |          |             |          |          |       |

**Supplementary Table 2.3:** Cross-tabulation for individual p62 cytoplasm and p62 nuclear scores with p-value

| Staining pattern |          | p62 nuclear |          |          | Total |
|------------------|----------|-------------|----------|----------|-------|
| p62 cytoplasm    | Score    | <b>0</b>    | <b>1</b> | <b>2</b> |       |
|                  | <b>0</b> | 9           | 2        | 1        | 12    |
|                  | <b>1</b> | 32          | 34       | 10       | 76    |
|                  | <b>2</b> | 17          | 5        | 5        | 27    |
|                  | <b>3</b> | 0           | 1        | 0        | 1     |
| <b>Total</b>     |          | 58          | 42       | 16       | 116   |
| <b>p= 0.090</b>  |          |             |          |          |       |

**Supplementary Table 3.1:** Cross-tabulation for p62 cytoplasm and p62 dots expression levels with p-value (bold = significant)

| Staining pattern |            | p62 dots |      | Total |
|------------------|------------|----------|------|-------|
| p62 cytoplasm    | Expression | Low      | High |       |
|                  | Low        | 23       | 35   | 58    |
|                  | High       | 25       | 33   | 58    |
| Total            |            | 48       | 68   | 116   |
| <b>p= 0.026</b>  |            |          |      |       |

**Supplementary Table 3.2:** Cross-tabulation for p62 nuclear and p62 dots expression levels with p-value

| Staining pattern |            | p62 dots |      | Total |
|------------------|------------|----------|------|-------|
| p62 nuclear      | Expression | Low      | High |       |
|                  | Low        | 23       | 35   | 58    |
|                  | High       | 25       | 33   | 58    |
| Total            |            | 48       | 68   | 116   |
| p= 0.851         |            |          |      |       |

**Supplementary Table 3.3:** Cross-tabulation for p62 nuclear and p62 cytoplasm expression levels with p-value

| Staining pattern |            | p62 cytoplasm |      | Total |
|------------------|------------|---------------|------|-------|
| p62 nuclear      | Expression | Low           | High |       |
|                  | Low        | 9             | 49   | 58    |
|                  | High       | 3             | 55   | 58    |
| Total            |            | 12            | 104  | 116   |
| p= 0.125         |            |               |      |       |

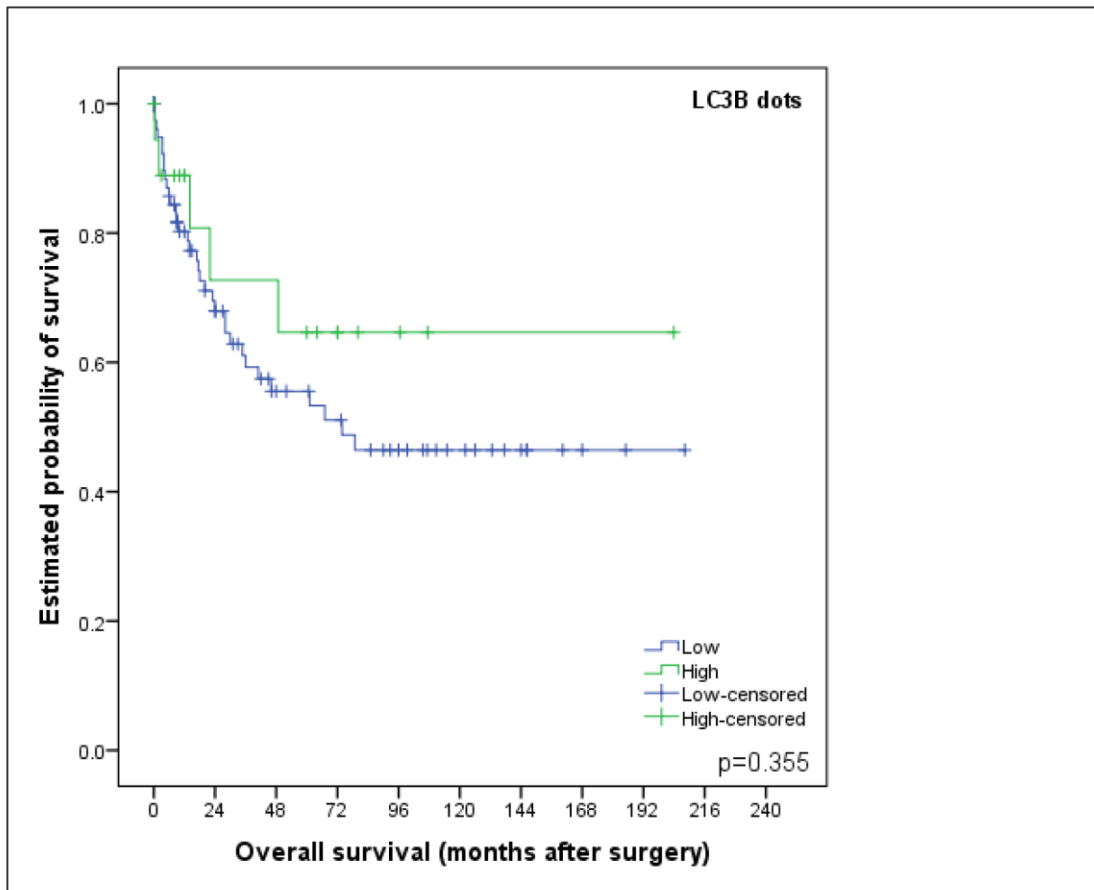

**Supplementary Figure 1:** Kaplan-Meier survival curves for LC3B dot-like staining patterns (low/high groups) in esophageal adenocarcinomas

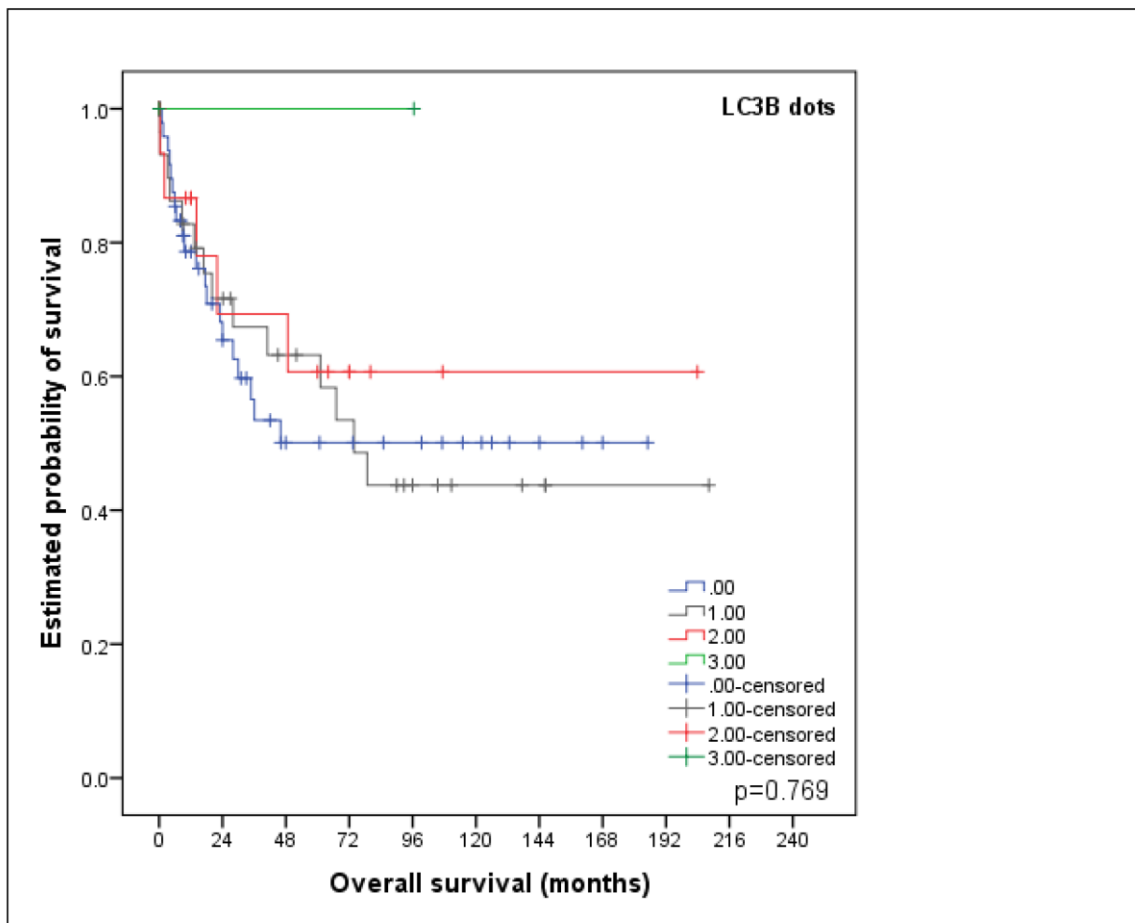

**Supplementary Figure 2:** Kaplan-Meier survival curves for LC3B dot-like staining patterns (individual scores) in esophageal adenocarcinomas

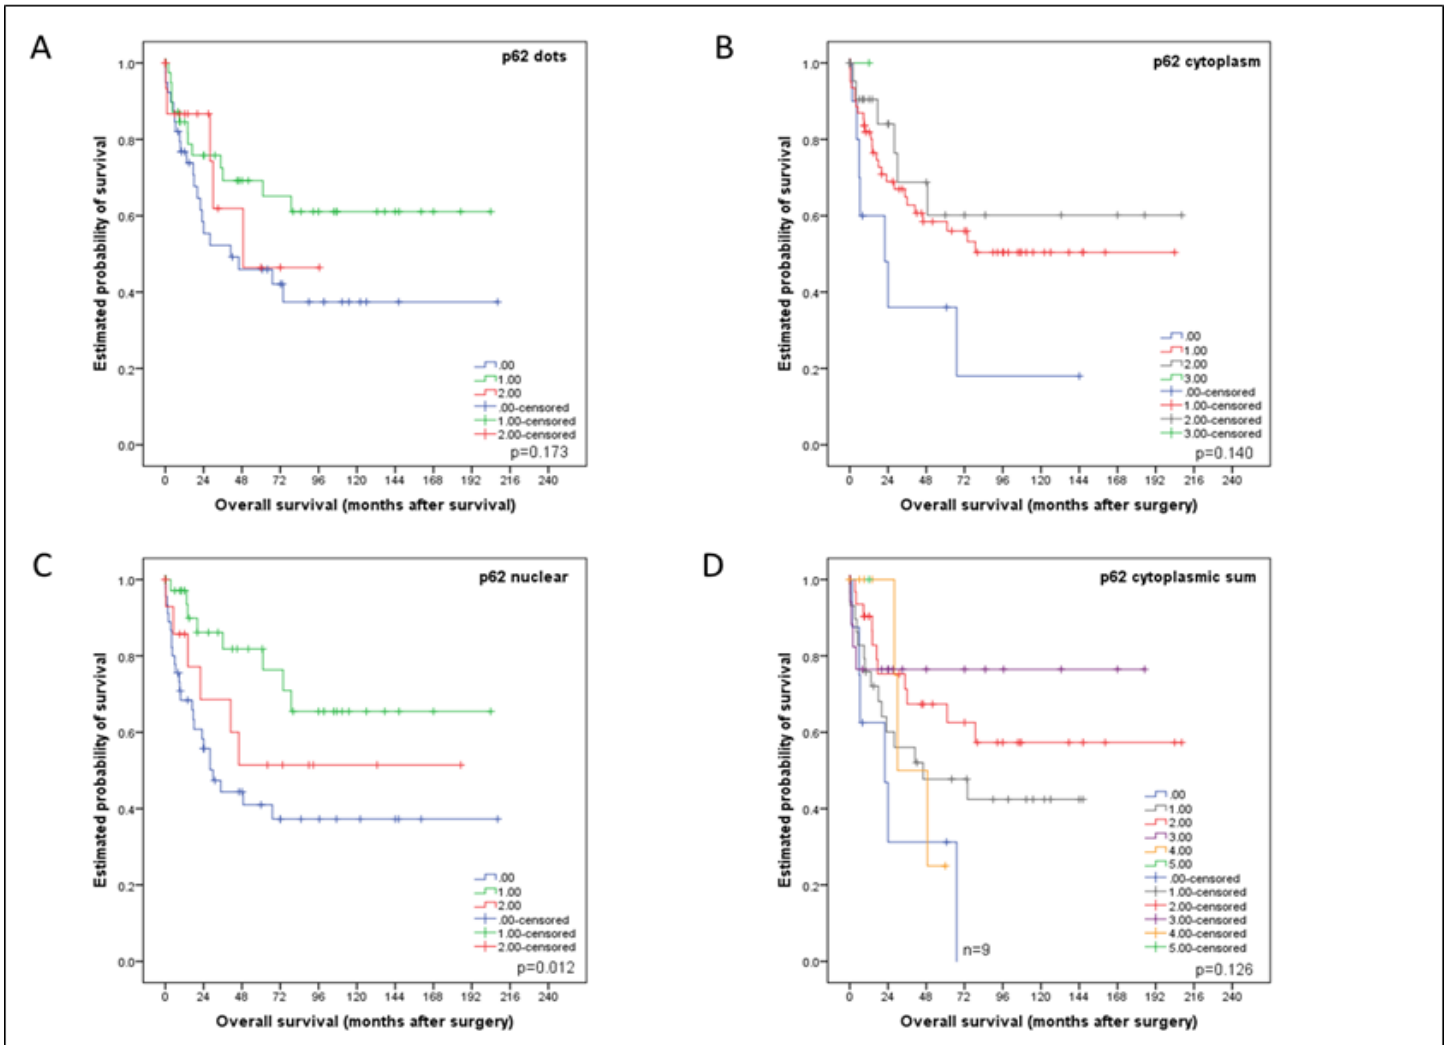

**Supplementary Figure 3:** Kaplan-Meier survival curves for individual scores of A) p62 dot-like staining, B) p62 cytoplasmic staining, C) p62 nuclear staining and D) p62 cytoplasmic sum score.

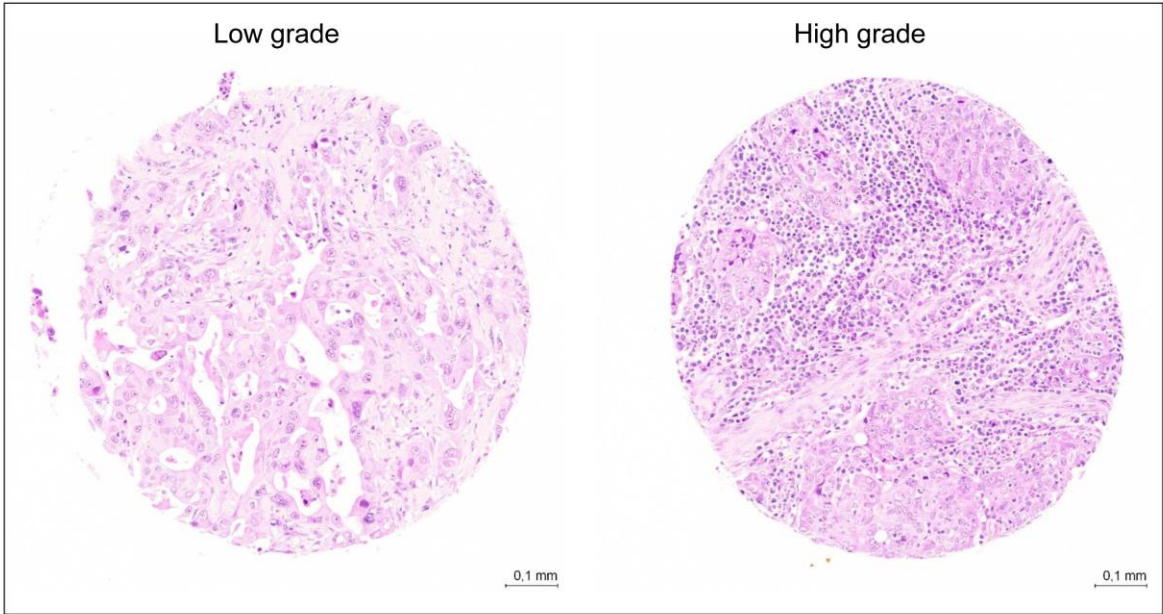

**Supplementary Figure 4:** Examples of extent of immunoinfiltrates in esophageal adenocarcinomas
